# Supplementary figures and images for: Identification and Validation of Common Reference Genes for Normalization of Esophageal Squamous Cell Carcinoma Gene Expression Profiles
Source: Hindawi journal article supplement (doi:10.1155/2022/9125242), 2022-01-01

A

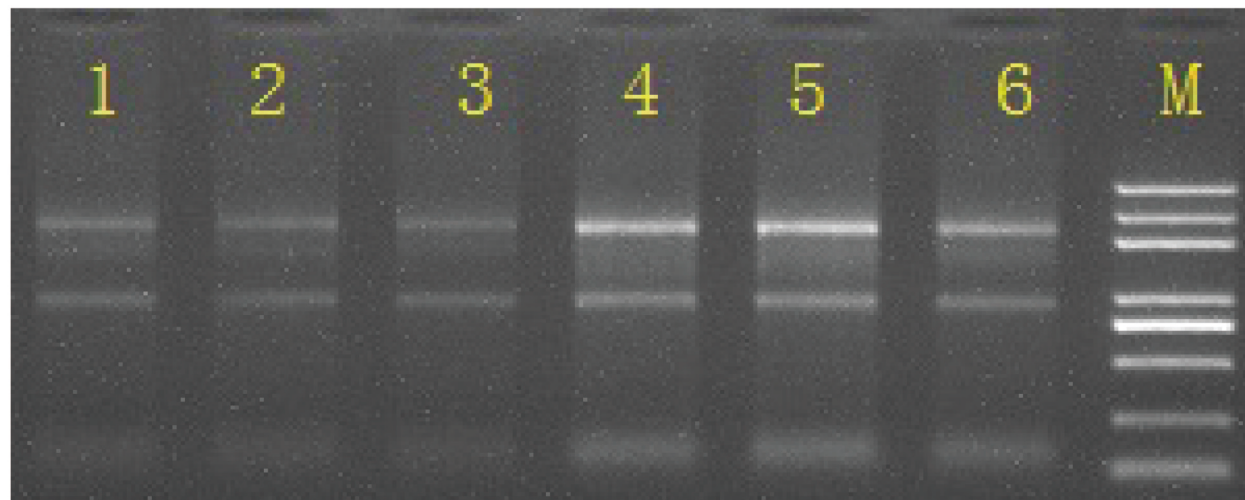

B

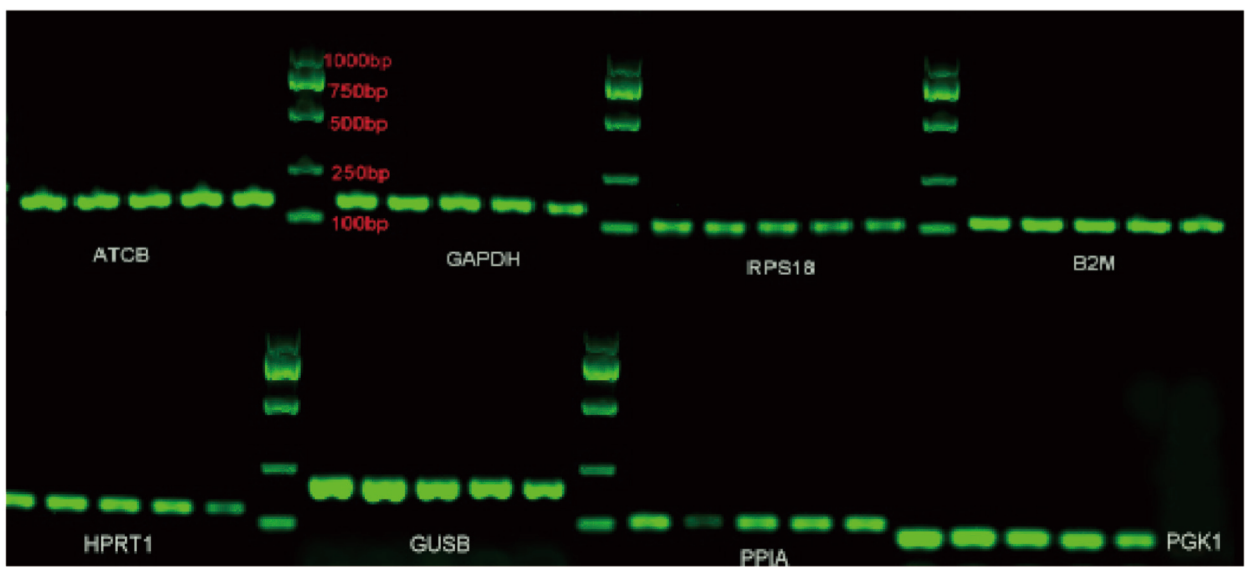

C

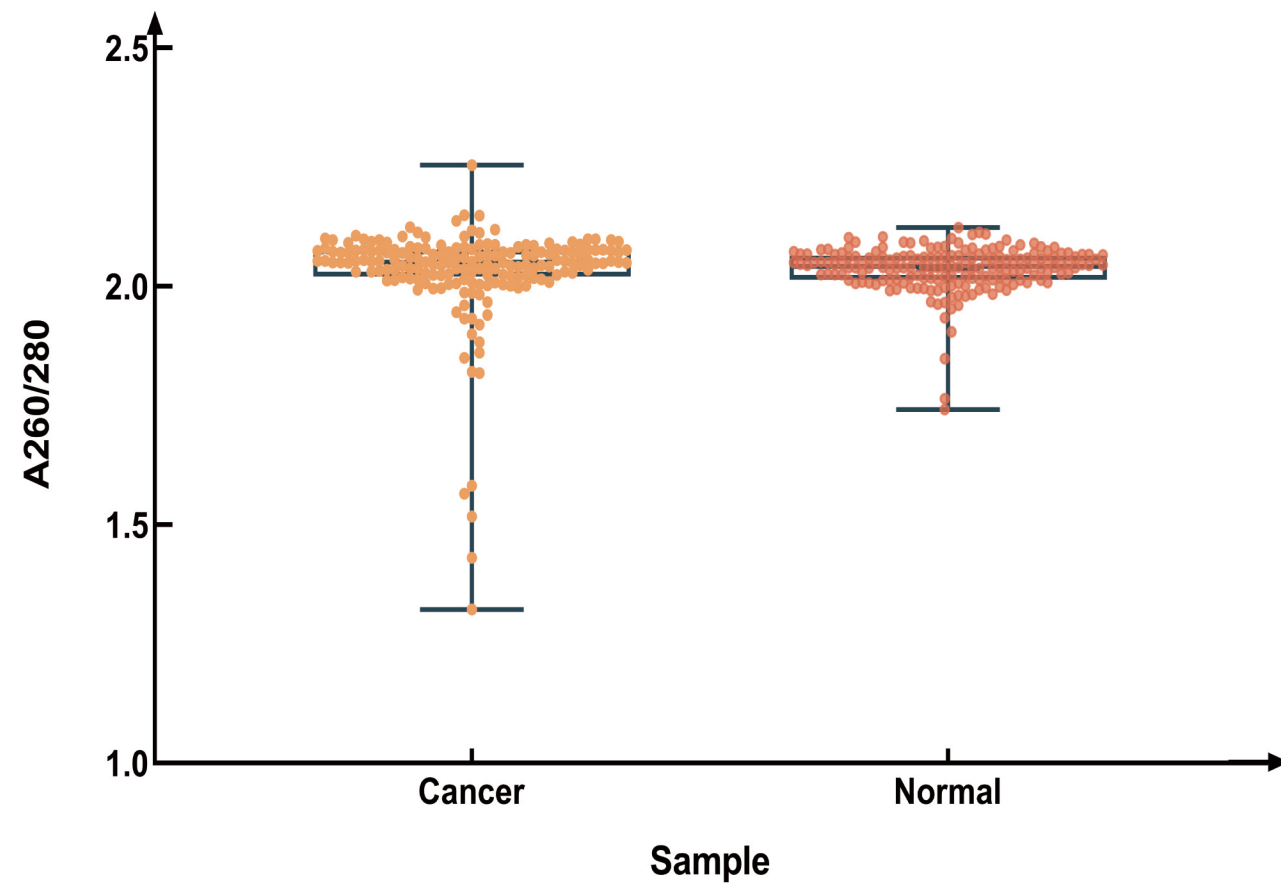

Supplement: f1 [file 9125242.f1.zip]
